# Apical Constriction Reversal upon Mitotic Entry Underlies Different Morphogenetic Outcomes of Cell Division

Clint S. Ko<sup>1</sup>, Prateek Kalakuntla<sup>1</sup>, and Adam C. Martin<sup>1</sup>

<sup>1</sup> Department of Biology,

Massachusetts Institute of Technology, Cambridge, MA 02142, USA

Corresponding author & Lead Contact:

Adam C. Martin

[acmartin@mit.edu](mailto:acmartin@mit.edu)

31 Ames St.

Cambridge, MA 02142, USA

## Running head (< 40 characters)

Mitosis antagonizes apical contractility

## Abbreviations used

Arm, Armadillo; Baz, Bazooka; Fog, Folded gastrulation; GPCR, G protein-coupled receptor; Pbl, Pebble; ROCK, Rho-associated coiled-coil kinase; Trbl, Tribbles

# Abstract

During development, coordinated cell shape changes and cell divisions sculpt tissues. While these individual cell behaviors have been extensively studied, how cell shape changes and cell divisions that occur concurrently in epithelia influence tissue shape is less understood. We addressed this question in two contexts of the early *Drosophila* embryo: premature cell division during mesoderm invagination, and native ectodermal cell divisions with ectopic activation of apical contractility. Using quantitative live-cell imaging, we demonstrated that mitotic entry reverses apical contractility by interfering with medioapical RhoA signaling. While premature mitotic entry inhibits mesoderm invagination, which relies on apical constriction, mitotic entry in an artificially contractile ectoderm induced ectopic tissue invaginations. Ectopic invaginations resulted from medioapical myosin loss in neighboring mitotic cells. This myosin loss enabled non-mitotic cells to apically constrict through mitotic cell stretching. Thus, the spatial pattern of mitotic entry can differentially regulate tissue shape through signal interference between apical contractility and mitosis.

# Introduction

Tissues grow in size and undergo complex morphogenetic movements to sculpt the embryo (LeGoff and Lecuit, 2015). Two major cell processes that contribute to morphogenesis are cell division and cell shape change. Often, these behaviors occur concurrently in the same tissue, leading to a complex interplay that can facilitate tissue-scale movements and shape changes (Etournay et al., 2015; Guirao et al., 2015; Li et al., 2014; Mao et al., 2013). For example, during the development of the *Drosophila* tracheal placode, cell division in the placode promotes fast cell internalization (Kondo and Hayashi, 2013). Cell divisions also drive cell rearrangements for proper gastrulation movements in the chick (Firmino et al., 2016) and promote tissue spreading during zebrafish epiboly (Campinho et al., 2013).

Apical constriction is a cell shape change that promotes tissue invagination (Leptin and Grunewald, 1990; Sawyer et al., 2010). During *Drosophila* gastrulation, the presumptive mesoderm cells on the ventral side of the embryo are internalized through coordinated apical constrictions that form the ventral furrow (Leptin and Grunewald, 1990; Sweeton et al., 1991). Apical contractility is activated by embryonic transcription factors Snail and Twist, which define mesoderm fate and also activate non-muscle myosin 2 (myosin) contractility through the small GTPase RhoA at the apical surface of cells (Costa et al., 1994; Dawes-Hoang et al., 2005; Kölsch et al., 2007; Young et al., 1991). In contrast to cases where cell divisions promote morphogenesis (Firmino et al., 2016; Kondo and Hayashi, 2013), premature mitotic entry during mesoderm invagination disrupts internalization (Großhans and Wieschaus, 2000; Mata et al., 2000; Seher and Leptin, 2000). Thus, cell division is actively repressed in the mesoderm. The

*tribbles* (*trbl*) gene is one ventral-specific inhibitor of mitosis. In *trbl* mutants, cells in the prospective mesoderm prematurely divide, which disrupts mesoderm invagination (Großhans and Wieschaus, 2000; Mata et al., 2000; Seher and Leptin, 2000). This phenotype demonstrated the importance of coordinating cell shape change and the cell cycle, but it was not known how cell division disrupts mesoderm invagination. For example, without live-cell imaging it was unclear whether cell division prevents apical constriction from initiating or whether it interferes with apical constriction after it has started.

In the early *Drosophila* embryo, the 14<sup>th</sup> cycle of mitotic divisions occurs in a stereotypical pattern across the blastula, called mitotic domains, which correspond to regions of *string* (*stg*) expression (Edgar and Datar, 1996; Edgar and O'Farrell, 1989, 1990; Farrell and O'Farrell, 2014; Foe, 1989). String is the *Drosophila* homolog of Cdc25, the protein phosphatase that reverses inhibitory phosphorylation on cyclin-dependent kinase (Cdk1) (Gould et al., 1990; Russell and Nurse, 1986). Tribbles acts to degrade String protein in the mesoderm (Mata et al., 2000). Ventral fate-specific mitotic inhibition promotes ventral furrow formation, but how the geometry and timing of mitotic entry influences cell and tissue shape change in other regions of the embryo is unknown.

Here, we determined how different spatial patterns of mitotic entry interact with apically constricting cells to affect tissue shape. In both native and artificially induced contractile epithelia, mitotic entry disrupts medioapical myosin activation and abrogates apical constriction. In the mesoderm, this disrupts tissue internalization. We showed that disruption of apical contractility is not due to loss of cell adhesion or apicobasal polarity

62 but depends on mitotic entry. In contrast, ectopically contractile cells in the dorsal  
 63 ectoderm situated between mitotic domains only apically constricted and invaginated  
 64 when neighboring cells entered mitosis. In this context, internalization was associated  
 65 with a force imbalance resulting from the loss of medioapical contractility in mitotic cells  
 66 that neighbor contractile, non-mitotic cells. These results indicate that distinct  
 67 morphogenetic outcomes result from different spatiotemporal patterns of mitotic entry  
 68 and resulting changes in force generation.

# Results

## Premature mesodermal mitotic entry in *trbl* mutant embryos reverses anisotropic apical constriction

Previous studies used fixed embryos to study the *trbl* mutant phenotype so that it was not known how cell division prevents mesoderm invagination. Therefore, to determine whether cell division prevents apical constriction from starting or impedes apical constriction after it has initiated, we imaged the apical surface of *trbl* mutant mesoderm cells in real time. We first verified the effectiveness of *trbl* RNA interference (RNAi) by imaging live embryos labeled for Histone::GFP (H2A::GFP) and membranes (Gap43::mCherry). Histone::GFP allowed us to visualize chromosome condensation, which marked mitotic entry. Consistent with previous work, *trbl* RNAi knockdown resulted in premature cell divisions in the mesoderm and a failure to form the ventral furrow (9/16 embryos) (Fig. 1, A and B; Video 1) (Großhans and Wieschaus, 2000; Mata et al., 2000; Seher and Leptin, 2000). The timing of mitotic entry was variable in *trbl* RNAi embryos, with most embryos initiating apical constriction before tissue-wide cell divisions occurred (Fig. 1B).

To quantify the effect of mitotic entry, we segmented representative embryos from these data sets. Normally, apical constriction of the mesoderm is associated with tissue invagination (Fig. 1A') (Costa et al., 1994; Leptin and Grunewald, 1990; Sweeton et al., 1991). In contrast to control embryos, mesoderm cells in *trbl* RNAi embryos increased apical cell area as a consequence of mitotic rounding, a common phenomenon observed in non-constricting epithelial cells (Champion et al., 2016;

Luxenburg et al., 2011; Reinsch and Karsenti, 1994; Rosa et al., 2015), which disrupted invagination (Fig. 1, B and B'; Video 1). We found individual cells that had initiated apical constriction then reversed their constricted shape and underwent apical expansion (Fig. 1C). Thus, mitotic, mesoderm cells do not sustain apical constriction.

An important feature of mesoderm cell apical constriction is that it is anisotropic, with greater constriction along the dorsoventral axis (Fig. 1, A and D) (Chanet et al., 2017; Martin et al., 2010). This is reflected in the increase of cell apex anisotropy (Fig. 1D, anisotropy > 1) in control embryos (Fig. 1E). However, in *trbl* embryos, after initial anisotropic constrictions, cell anisotropy decreased and approached a value of 1 due to mitotic rounding (Fig. 1E). These results suggested that premature mitotic entry in the mesoderm reverses anisotropic apical constriction, which is normally required for generating inward tissue curvature and internalization (Chanet et al., 2017).

### **Mitotic entry disrupts medioapical myosin activation**

Apical constriction and mitotic rounding are dependent on actomyosin-based contractility (Dawes-Hoang et al., 2005; Kunda et al., 2008; Maddox and Burrridge, 2003; Matthews et al., 2012; Rosa et al., 2015; Young et al., 1991). In the mesoderm, this involves an organized contractile machine with myosin enriched near the middle of the apical domain, the medioapical cortex (Mason et al., 2013; Coravos and Martin, 2016). To determine how premature mitotic entry in *trbl* mutants affected medioapical myosin, we imaged live embryos that were trans-heterozygous for a deficiency (Df(3L)ri79c) and a P-element insertion (EP(3)3519) that disrupt the *trbl* gene, which has previously been shown to exhibit the *trbl* mutant phenotype (Großhans and Wieschaus, 2000; Seher and

Leptin, 2000). In contrast to wild-type or heterozygote embryos, which accumulate medioapical myosin, medioapical myosin failed to accumulate in Df/EP3519 embryos, with myosin instead localizing to junctional interfaces (Fig. 2, A and B; Video 2). Despite initiating myosin accumulation, medioapical myosin was not sustained in ventral cells that entered mitosis (Fig. 2, A and B; Video 2). We obtained a similar result when we overexpressed *string* (Cdc25) in the early embryo (Fig. S1), which phenocopies *trbl* embryos (Großhans and Wieschaus, 2000; Seher and Leptin, 2000). Thus, medioapical myosin activation is disrupted in ventral cells that prematurely enter mitosis, consistent with the observed increases in apical cell area (Fig. 1B').

To determine whether loss of medioapical myosin was a general feature of dividing, contractile epithelial cells, we took advantage of the stereotyped cell divisions in the early mitotic domains that occur on the dorsal side of the head (Foe, 1989), particularly focusing on mitotic domains 1 and 5 (Fig. 2C). We artificially increased ectoderm apical contractility by ectopically expressing *folded gastrulation* (*fog*), a ligand for a G-protein-coupled receptor (GPCR) that is expressed in the mesoderm and functions upstream of apical myosin activation (Costa et al., 1994; Dawes-Hoang et al., 2005; Manning et al., 2013; Sweeton et al., 1991). However, GPCR for Fog is also present in the ectoderm and ectopic *fog* expression in this tissue leads to apical myosin accumulation (Dawes-Hoang et al., 2005; Kerridge et al., 2016). This allowed us to directly compare apical myosin levels in mitotic and non-mitotic cells in the same tissue without interfering with the normal developmental progression of cell divisions in the embryo. Similar to *trbl* mutant embryos, Fog-induced medioapical myosin decreased in mitotic cells (Fig. 2, D – F; Video 3). As medioapical myosin spots dissipated, myosin

localization became isotropically localized around the cell cortex, a feature of mitotic rounding (Fig. 2, D and E) (Maddox and Burridge, 2003; Matthews et al., 2012; Ramanathan et al., 2015; Rosa et al., 2015; Stewart et al., 2010). The medioapical myosin meshwork returned in both daughter cells after mitotic exit and cytokinesis (Fig. 2E). These results suggested that mitotic entry temporarily overrides cell type-specific signaling in both mesoderm and ectoderm that promotes apical contractility and tissue-level force transmission (Martin et al., 2010; Yevick et al., 2019).

# **Medioapical myosin disruption is not due to loss of cell adhesion or apicobasal polarity**

Because cells round up upon disruption of adherens junctions (Martin et al., 2010), it was possible that mitotic entry disrupted intercellular adhesion. However, the disruption of medioapical myosin preceded the apical cell area expansion (i.e., rounding), suggesting the apical myosin loss is not caused by disrupted adhesion (Fig. 2F). To test whether changes in myosin regulation were dependent on changes in cell shape or adhesion during cell division, we disrupted cell adhesion with maternal and zygotic loss-of-function mutant in the *Drosophila*  $\beta$ -catenin gene (*armadillo*, *arm*) and analyzed mitotic progression. The *arm* mutant disrupts the mechanical integrity of tissues, causing constitutively round cells that do not invaginate (Cox et al., 1996; Dawes-Hoang et al., 2005). However, mechanically-uncoupled cells still maintained apical myosin (Fig. 3, A and B) (Dawes-Hoang et al., 2005; Martin et al., 2010). Even when cell adhesion was lost and individual cells became rounded, apical contractility was sustained (Fig. 3, A and B).

During gastrulation, cell division normally proceeds in mesoderm cells after they have internalized (Foe, 1989). However, because *arm* mutants block invagination, we could examine the consequence of mitotic entry on non-adherent cells at the embryo surface. In *arm* mutants, myosin spots disappeared only when the mesoderm cells entered mitosis even though cells had maintained a rounded morphology prior to mitoses (Fig. 3C). Thus, the switch in myosin regulation is independent of changes in cell shape and adhesion, suggesting that mitotic entry disrupts other processes that are required for apical contractility.

Alternatively, we hypothesized that apical contractility defects could be due to a loss of apicobasal polarity. To test this, we determined if mitotic entry of ectodermal cells in embryos with ectopic *fog* expression affected the apical-basal polarity of Bazooka (Baz, Par3), a component of the apical polarity complex that plays an important role in establishing and maintaining apicobasal polarity (Bilder et al., 2003; Harris and Peifer, 2004, 2007). In both mitotic and non-mitotic cells of embryos with ectopic *fog* expression, Baz was localized to apical junctions (Fig. 3, D - F). Polarized Baz localization was retained during mitotic rounding (Fig. 3, E and F), suggesting that loss of medioapical myosin at the onset of mitotic rounding was also not due to a loss of apicobasal polarity.

## **Mitotic entry in apically constricting cells changes RhoA regulation**

To determine the basis for mitosis-dependent changes in myosin localization, we examined RhoA activity in *trbl* mutants and in the early mitotic domains of embryos with ectopic *fog* expression. Apical constriction and mitotic rounding involve RhoA activation

downstream of the Rho guanine nucleotide exchange factors (GEFs), RhoGEF2 and Ect2/Pebble (Pbl), respectively (Barrett et al., 1997; Häcker and Perrimon, 1998; Kölsch et al., 2007; Maddox and Burrridge, 2003; Matthews et al., 2012; Rosa et al., 2015; Yoshizaki et al., 2003). As a marker for RhoA activity, we first examined the localization of Rho-associated coiled-coil kinase (ROCK), the RhoA effector that exhibits RhoA-dependent medioapical cortex localization during apical constriction (Mason et al., 2016). ROCK phosphorylates and activates myosin (Amano et al., 1996; Mason et al., 2013; Mizuno et al., 1999; Royou et al., 2002). In Df/EP3519 *trbl* mutant embryos, medioapical ROCK localization was lost in mesoderm cells when they prematurely entered mitosis (Fig. 4, A and B). Thus, mitotic entry disrupted medioapical ROCK localization associated with apical constriction, suggesting a disruption of medioapical RhoA activity.

To determine how RhoA activity was disrupted, we investigated the localization of RhoGEFs that are associated with either apical constriction or mitotic rounding. RhoGEF2 promotes medioapical contractility and apical constriction (Barrett et al., 1997; Häcker and Perrimon, 1998; Kerridge et al., 2016) and mitotic cell rounding and cytokinetic furrow formation is regulated through Ect2/Pbl (Maddox and Burrridge, 2003; Matthews et al., 2012; Prokopenko et al., 1999; Rosa et al., 2015; Su et al., 2011; Yüce et al., 2005). To examine changes in RhoGEF localization upon mitotic entry, we imaged mitotic domains in embryos ectopically expressing *fog*, due to technical challenges with combining GFP-tagged RhoGEFs with the *trbl* mutants. First, we fixed embryos with ectopic *fog* expression that also expressed GFP-tagged RhoGEF2 under an endogenous promoter and immunostained with an anti-GFP antibody.

Immunofluorescence of fixed embryos gave us the clearest signal to visualize RhoGEF2 in mitotic cells because the autofluorescence of the vitelline membrane could be removed. Consistent with previous work in mesoderm cells, non-mitotic ectoderm cells ectopically expressing *fog* exhibited apically enriched, junctional RhoGEF2 (Fig. 4C) (Kölsch et al., 2007; Mason et al., 2016). In contrast, there was a clear reduction of apico-junctional RhoGEF2 and an associated increase in cytoplasmic signal in mitotic cells (Fig. 4C, yellow arrowheads). In contrast, Ect2/Pbl relocated from the nucleus to the cortex and became enriched at the spindle midzone in mitotic cells, as previously described (Fig. 4D) (Matthews et al., 2012; Rosa et al., 2015). These results suggested that Ect2/Pbl-mediated cortical contractility is dominant over apical contractility mediated by RhoGEF2 (Kölsch et al., 2007) and that the two pathways do not function additively.

## **Mitotic entry flanking contractile tissue promotes invagination via downregulation of opposing force**

While premature mitotic entry in the mesoderm inhibited its invagination, we discovered that cell divisions in the dorsal head of embryos with ectopic *fog* expression promoted ectopic tissue invaginations (Fig. 5, A and B). Normally, mitotic domains do not result in furrow formation (Foe 1989), as shown in control embryos lacking ectopic *fog* expression (Fig. S2). In contrast, when *fog* was ectopically expressed in embryos, ectopic furrows formed between mitotic domains in regions where cells maintained apical contractility (Fig. 5, A and B; Video 3).

To determine how furrows formed between mitotic domains, we analyzed the apical area of non-mitotic cells that formed the ectopic furrow. In control embryos, non-mitotic cells situated between mitotic domains did not exhibit a net decrease in apical area, presumably because these cells did not generate contractile force (Fig. 5C). In contrast, cells between mitotic domains in embryos ectopically expressing *fog* underwent apical constriction (Fig. 5C). Importantly, invagination was only triggered when cells in the mitotic domains entered mitosis (Fig. 5D), and these invaginations occurred well before the completion of cytokinesis, suggesting that mitotic entry and not increased cell number promoted invagination. Thus, within a uniformly contractile tissue, domains of cell that enter mitosis can promote constriction of neighboring cells.

Because furrowing only occurred when the ectoderm was contractile, we tested how mitotic domains promote apical constriction in neighboring cells. One hypothesis is that furrowing could be due to isotropic pushing forces generated by mitotic rounding (Kondo and Hayashi, 2013). Alternatively, because mitotic entry reduces medioapical contractility, mitotic entry could downregulate force opposing constriction and allow neighboring cells to change shape. Cell expansion or relaxation is important for morphogenesis in other contexts, often compensating for changes in neighboring tissue regions (Gutzman and Sive, 2010; Perez-Mockus et al., 2017; West et al., 2017). If the latter case is true, one prediction is that mitotic cells would stretch towards the ectopic furrow because of pulling forces from adjacent, contractile cells. Consistent with both hypotheses, the apical areas of mitotic cells increased to the same extent regardless of *fog* overexpression (Fig. 5C). However, the mitotic domain cells in embryos with ectopic *fog* expression elongated towards the ectopic furrow (Fig. 5, C and E), with a greater

increase in cell apex anisotropy than control embryos, suggesting that the intervening non-mitotic cells that apically constrict pull and stretch mitotic cells (Fig. 5, A and B). Furthermore, the apical area of ectopic furrow cells only reduced after neighboring cells entered mitosis (Fig. 5D), lending additional support to the idea that mitotic cells relax or expand their shape relative to neighboring non-mitotic cells, creating a force imbalance that allows neighboring cells to constrict their apices and invaginate. These results indicated that the reversal of medioapical contractility and apical expansion that happens in mitotic entry promotes tissue invagination when mitotic entry occurs adjacent to contractile cells (Fig. 6).

# Discussion

Here, we investigated the impact of mitotic entry in two different contractile epithelia with opposing tissue shape outcomes. Cell cycle-regulated changes in the cell, in particular the formation of an isotropic actomyosin cortex during mitotic rounding, is commonly observed across epithelial cell types and has been well-characterized (Maddox and Burridge, 2003; Matthews et al., 2012; Ramanathan et al., 2015; Rosa et al., 2015; Sorce et al., 2015; Stewart et al., 2010). However, it was previously unknown how mitotic entry would dynamically affect epithelial cells that are actively constricting. Through live imaging of apically constricting cells undergoing mitosis, we found that mitotic entry disrupts medioapical contractile signaling. In both the mesoderm of *trbl* mutants and the ectoderm with ectopic *fog* expression, medioapical myosin accumulation was reversed. We found that this change was followed by cell rounding and isotropic cortical myosin assembly, which are specific to mitotic entry and not due to loss of cell adhesion. Indeed, previous work has demonstrated that mitotic progression in epithelial cells is only associated with local remodeling of cell adhesion at the site of cytokinesis, which allows epithelial integrity to be maintained (Founounou et al., 2013; Guillot and Lecuit, 2013; Herszterg et al., 2013; Higashi et al., 2016). The loss of medioapical myosin was not due to loss of cell adhesion or apicobasal polarity because mitotic downregulation of myosin still occurred in *arm* mutant germline clones and Baz localization remained apical throughout mitosis. Importantly, we also found that mitotic entry disrupts medioapical RhoA signaling and cortical RhoGEF2 localization, even though Ect2/Pbl becomes cortical, as previously reported (Matthews et al., 2012; Rosa et al., 2015).

We present a new paradigm for how cell divisions influence morphogenetic events; cell cycle-dependent changes in RhoA regulation can either inhibit or promote tissue shape change depending on differences in their spatiotemporal pattern in the tissue. During mesoderm invagination, mitotic downregulation of medioapical contractility in the same cells that are needed to undergo apical constriction disrupted invagination (Großhans and Wieschaus, 2000; Leptin and Grunewald, 1990; Mata et al., 2000; Seher and Leptin, 2000; Sweeton et al., 1991). In contrast, mitotic downregulation of medioapical contractility in cells neighboring contractile cells promoted invagination. Here, we propose that medioapical myosin loss upon mitotic entry caused apical cortex relaxation relative to neighboring contractile cells. In support of this force imbalance, mitotic cells expand towards constricting cells, leading to mitotic cell anisotropy. In contrast, mitotic cells in the mesoderm of *trbl* mutants expanded their apical areas isotropically. Thus, cell cycle-mediated loss of medioapical myosin can be harnessed to provide local regions of tissue relaxation that can drive tissue folding.

Mitotic entry overrides or inhibits intracellular signaling that promotes the assembly of the medioapical contractile machine, remodeling the cytoskeleton in a way that leads to relaxation of the apical cortex. This creates a force imbalance where mitotic cells can become more compliant relative to their neighbors. This is similar to the idea that lateral ectoderm cells in the *Drosophila* embryo are less stiff, allowing the mesoderm to internalize (Perez-Mockus et al., 2017). Differences in epithelial tension also drive tissue folds in the *Drosophila* wing discs (Sui et al., 2018), although cell divisions are not involved in this process. In light of our results, it would be interesting to examine whether epithelial invagination in other contexts are bordered by cell divisions.

One potential molecular explanation for why medioapical myosin is lost during mitosis is that the two distinct cytoskeletal organizations that promote apical constriction or mitotic rounding compete for a limited pool of cytoskeletal components. Limited availability of actin monomers have been shown to play a role in how different actin network densities and sizes are regulated (Suarez and Kovar, 2016). For example, in fission yeast, inhibiting F-actin polymerization through the Arp2/3 complex results in an increase in formin-mediated F-actin assembly (Burke et al., 2014). However, given the apparent changes to RhoA signaling that occur in *fog* positive cells that enter mitosis, we favor a model in which signaling crosstalk or competition for upstream signals disrupts apical RhoA signaling (Agarwal and Zaidel-Bar, 2018; Jaffe and Hall, 2005).

To promote the assembly of medioapical actomyosin networks in the early *Drosophila* embryo, RhoGEF2 is the primary RhoA GEF (Barrett et al., 1997; Dawes-Hoang et al., 2005; De Las Bayonas et al., 2019; Fox and Peifer, 2007; Häcker and Perrimon, 1998; Kölsch et al., 2007). RhoGEF2 is thought to be particularly important for activating medioapical contractility (De Las Bayonas et al., 2019; Kerridge et al., 2016). To promote mitotic rounding, Ect2/Pebble is the primary RhoA activator (Matthews et al., 2012; Rosa et al., 2015). Our results indicate that these distinct Rho GEFs do not act additively. However, the precise nature by which RhoA activity is regulated downstream of RhoGEF2 and Ect2/Pebble in the same cell is still unclear. Activation of mitotic entry may affect RhoGEF2 localization because medioapical RhoGEF2 is influenced by microtubules and microtubule dynamics change in mitosis (De Las Bayonas et al., 2019; Rogers et al., 2004). However, disruption of microtubules does not prevent medioapical myosin activation (Ko et al., 2019). Mitotic entry may also

330 affect signaling processes upstream of Rho GEF activation, such as the well-  
331 characterized case of GPCR signaling in *Drosophila* that activates different modes of  
332 contractility (Costa et al., 1994; Dawes-Hoang et al., 2005; Jha et al., 2018; Kerridge et  
333 al., 2016).

## Materials and Methods

### Fly stocks and genetics

Fly stocks and crosses used in this study are listed in Table S1. Crosses were maintained at 27 °C. In the F2 generation, non-balancer females and males were used to set up cages that were incubated at 25 °C. All other crosses and cages were maintained at 25 °C. To generate maternal and zygotic *arm* mutants expressing Myo::GFP, *arm*<sup>034A01</sup> FRT101/FM7; sqh-GFP females were crossed to male *ovo*<sup>D</sup> FRT101/Y; hsFlp to obtain *arm*<sup>034A01</sup> FRT101/ *ovo*<sup>D</sup> FRT101 females. These females were heat shocked at the larval stage at 37 °C for 2 hours over 3 to 4 days to induce mitotic recombination.

### Live and fixed imaging

For live imaging, embryos were dechorionated in 50% bleach, washed in water, and mounted onto a glass slide coated with glue (double-sided tape dissolved in heptane). Coverslips (No. 1.5) coated in glue were attached to the slide to use as spacers and a No. 1 coverslip was attached on top to create a chamber. Halocarbon 27 oil was used to fill the chamber. All imaging took place at room temperature (~ 23 °C).

For fixed imaging, embryos with ectopic *fog* expression and control (Rhodopsin-3 shRNA line) embryos were dechorionated in bleach, washed in water, and fixed in 8% paraformaldehyde in 0.1 M phosphate buffer at pH 7.4 with 50% heptane for 30 min and manually devitellinized with a 26 G ½ hypodermic needle (Beckton Dickinson). Embryos were washed in 0.01% Tween 20 in PBS (PBS-T) and blocked with 10% BSA in PBS-T

(blocking buffer) for 1 hour. Primary antibodies were diluted in a 50:50 mixture of blocking buffer:PBS-T (dilution buffer) and embryos were incubated for 2 hours at room temperature or overnight at 4 °C. To visualize RhoGEF2, we used embryos that expressed GFP-tagged RhoGEF2 under an endogenous promoter, which was recognized with an anti-GFP antibody (Produced by our lab) diluted at 1:500. F-actin was visualized by incubating embryos with Alexa Fluor 647-conjugated phalloidin (Invitrogen) in dilution buffer. Secondary antibodies against the rabbit anti-GFP antibody was conjugated with Alexa Fluor 488 (Invitrogen) diluted at 1:500 in dilution buffer and incubated for 2 hours at room temperature or overnight at 4 °C. After incubations, embryos were mounted onto glass slides using AquaPolymount (Polysciences) and dried overnight.

All images were taken on a Zeiss LSM 710 confocal microscope with a 40x/1.2 Apochromat water objective lens, an argon ion, 561 nm diode, 594 nm HeNe, 633 HeNe lasers, and Zen software. Pinhole settings ranged from 1 – 2.5 airy units. For two-color live imaging, band-pass filters were set at ~490 – 565 nm for GFP and ~590 – 690 nm for mCH. For three-color imaging, band-pass filters were set at ~480 – 560 nm for Alexa Fluor 488 and ~660 – 750 nm for Alexa Fluor 647.

### **dsRNA injections**

To generate dsRNA that targets *trbl* transcripts for RNAi, the following primers were used to generate ~200-base pair fragment: forward, 5'- TAA TAC GAC TCA CTA TAG GGT GCA GTA TGA ATC ACT GGA AGG -3', and reverse, 5'- TAA TAC GAC TCA CTA TAG GGC CAC CAA CAT GGT GTA CAG G-3'. Each primer contains a T7

sequence at its 5' end for use with the MEGAshortscript T7 transcription kit (Thermo Fisher Scientific). The reaction was placed in boiling water and allowed to cool to room temperature. RNA was extracted with phenol:chloroform, washed with ethanol, and resuspended in injection buffer (0.1x phosphate-buffered saline in DEPC water).

Dechorionated embryos were mounted onto glass slides and desiccated for 4 minutes using Drierite (Drierite). Embryos were covered with a 3:1 mixture of halocarbon 700/halocarbon 27 oils and then injected laterally with dsRNA in injection buffer into stage 2 embryos. As a control, injection buffer was injected. After injection, excess oil was wicked off and slides were prepared for live imaging. Embryos were incubated at 25 °C until they had completed cellularization.

## **Image processing and analysis**

All images were processed using MATLAB (MathWorks) and FIJI (<http://fiji.sc/wiki/index.php/Fiji>). A Gaussian smoothing filter (kernel = 1 pixel) was applied. Apical projections are maximum intensity Z-projections of multiple z sections (2-4  $\mu\text{m}$ ) and sub-apical sections are optical slices that are 1 - 2  $\mu\text{m}$  below the apical sections.

Image segmentation for quantifications of cell area and anisotropy as well as myosin intensities was performed using custom MATLAB software titled EDGE (Embryo Development Geometry Explorer; <https://github.com/mgelbart/embryo-development-geometry-explorer>; Gelbart et al., 2012). Cell boundaries were automatically detected and manually corrected, after which EDGE exported cell area and anisotropy data. Cell apex anisotropy is calculated by fitting an ellipse to each cell. This measurement is

calculated relative to the embryonic anteroposterior (AP) and dorsoventral (DV) axes.

The length from the center of the ellipse to the edge along the AP axis is divided by the length from the center to the edge along the DV axis. For the cell area analysis of mitotic domain and non-mitotic domain cells (Fig. 5 D), we smoothed the cell area data for each cell by a moving average (5 time steps wide).

To calculate the ratio of apical:basal Baz::GFP intensities, orthogonal (x-z) images were created for individual cells. A 15 pixel by 25 pixel region of interest was specified and the maximum pixel intensity within the region was calculated. This was done for both apical and basolateral regions, where the basolateral region was defined as being 25 pixels lower than the apical region. The mean background fluorescence was subtracted from the maximum pixel intensities of the apical and basal regions for each cell. Then the ratio of apical to basal intensity was calculated by dividing the corrected apical intensity by the corrected basal intensity.

## Acknowledgments

We would like to thank members of the Martin laboratory for their helpful comments and suggestions on the project. We would also like to thank Iain Cheeseman and Becky Lamason for their suggestions on the project and comments on a draft of this manuscript. Finally, we thank the Bloomington Stock Center and TRiP at Harvard Medical School (National Institutes of Health/National Institute of General Medical Sciences grant) for fly stocks used in this study. This work was supported by National Institute of General Medical Sciences grant R01-GM125646 to A. C. Martin.

Author contributions: C.S. Ko and A.C. Martin conceptualized the project and designed experiments. C.S. Ko and P. Kalakuntla performed the experiments. C.S. Ko and P. Kalakuntla analyzed the data. C.S. Ko and A.C. Martin wrote the manuscript. All authors reviewed and approved the final version of the manuscript.

## References

- Agarwal, P., and Zaidel-Bar, R. (2018). Principles of Actomyosin Regulation In Vivo. *Trends in Cell Biology*, 1-14.
- Amano, M., Ito, M., Kimura, K., Fukata, Y., Chihara, K., Nakano, T., Matsuura, Y., and Kaibuchi, K. (1996). Phosphorylation and Activation of Myosin by Rho-associated Kinase (Rho-kinase). *The Journal of Biological Chemistry* 271, 20246-20249.
- Barrett, K., Leptin, M., and Settleman, J. (1997). The Rho GTPase and a Putative RhoGEF Mediate a Signaling Pathway for the Cell Shape Changes in *Drosophila* Gastrulation. *Cell* 91, 905-915.
- Bilder, D., Schober, M., and Perrimon, N. (2003). Integrated activity of PDZ protein complexes regulates epithelial polarity. *Nature Publishing Group* 5, 53-58.
- Burke, T.A., Christensen, J.R., Barone, E., Suarez, C., Sirotkin, V., and Kovar, D.R. (2014). Homeostatic Actin Cytoskeleton Networks Are Regulated by Assembly Factor Competition for Monomers. *Current Biology* 24, 579-585.
- Campinho, P., Behrndt, M., Ranft, J., Risler, T., Minc, N., and Heisenberg, C.-P. (2013). Tension-oriented cell divisions limit anisotropic tissue tension in epithelial spreading during zebrafish epiboly. *Nature Cell Biology* 15, 1405-1414.
- Champion, L., Linder, M.I., and Kutay, U. (2016). Cellular Reorganization during Mitotic Entry. *Trends in Cell Biology*, 1-16.
- Chanet, S., Miller, C.J., Vaishnav, E.D., Ermentrout, B., Davidson, L.A., and Martin, A.C. (2017). Actomyosin meshwork mechanosensing enables tissue shape to orient cell force. *Nature Communications* 8, 1-13.
- Costa, M., Wilson, E.T., and Wieschaus, E.F. (1994). A Putative Cell Signal Encoded by the folded gastrulation Gene Coordinates Cell Shape Changes during *Drosophila* Gastrulation. *Cell* 76, 1075-1089.
- Cox, R.T., Kirkpatrick, C., and Peifer, M. (1996). Armadillo is required for adherens junction assembly, cell polarity, and morphogenesis during *Drosophila* embryogenesis. *The Journal of Cell Biology* 134, 133-148.
- Dawes-Hoang, R.E., Parmar, K.M., Christiansen, A.E., Phelps, C.B., Brand, A.H., and Wieschaus, E.F. (2005). folded gastrulation, cell shape change and the control of myosin localization. *Development* 132, 4165-4178.
- De Las Bayonas, A.G., Philippe, J.-M., Lellouch, A.C., and Lecuit, T. (2019). Distinct RhoGEFs Activate Apical and Junctional Contractility under Control of G Proteins during Epithelial Morphogenesis. *Current Biology*, 1-24.

Edgar, B.A., and Datar, S.A. (1996). Zygotic degradation of two maternal Cdc25 mRNAs terminates Drosophila's early cell cycle program. *Genes & Development* 10, 1966-1977.

Edgar, B.A., and O'Farrell, P.H. (1989). Genetic Control of Cell Division Patterns in the Drosophila Embryo. *Cell* 57, 177-187.

Edgar, B.A., and O'Farrell, P.H. (1990). The Three Postblastoderm Cell Cycles of Drosophila Embryogenesis Are Regulated in G2 by string. *Cell* 62, 469-480.

Etournay, R., Popovic, M., Merkel, M., Nandi, A., Blasse, C., Aigouy, B., Brandi, H., Myers, G., Salbreux, G., Julicher, F., *et al.* (2015). Interplay of cell dynamics and epithelial tension during morphogenesis of the Drosophila pupal wing. 1-51.

Farrell, J.A., and O'Farrell, P.H. (2014). From Egg to Gastrula: How the Cell Cycle Is Remodeled During the Drosophila Mid-Blastula Transition. *Annual Review of Genetics* 48, 269-294.

Firmino, J., Rocancourt, D., Saadaoui, M., Moreau, C., and Gros, J. (2016). Cell Division Drives Epithelial Cell Rearrangements during Gastrulation in Chick. *Developmental Cell* 36, 249-261.

Foe, V.E. (1989). Mitotic domains reveal early commitment of cells in Drosophila embryos. *Development* 107, 1-22.

Founounou, N., Loyer, N., and Le Borgne, R. (2013). Septins Regulate the Contractility of the Actomyosin Ring to Enable Adherens Junction Remodeling during Cytokinesis of Epithelial Cells. *Developmental Cell* 24, 242-255.

Fox, D.T., and Peifer, M. (2007). Abelson kinase (Abl) and RhoGEF2 regulate actin organization during cell constriction in Drosophila. *Development* 134, 567-578.

Gould, K.L., Moreno, S., Tonks, N.K., and Nurse, P. (1990). Complementation of the Mitotic Activator, p80cdc25 by a Human Protein-Tyrosine Phosphatase. *Science* 250, 1573-1576.

Großhans, J., and Wieschaus, E.F. (2000). A Genetic Link between Morphogenesis and Cell Division during Formation of the Ventral Furrow in. *Cell* 101, 523-531.

Guillot, C., and Lecuit, T. (2013). Adhesion Disengagement Uncouples Intrinsic and Extrinsic Forces to Drive Cytokinesis in Epithelial Tissues. *Developmental Cell* 24, 227-241.

Guirao, B., Rigaud, S.U., Bosveld, F., Bailles, A., Lopez-Gay, J., Ishihara, S., Sugimura, K., Graner, F., and Bellaïche, Y. (2015). Unified quantitative characterization of epithelial tissue development. *eLife*, 1-52.

- Gutzman, J.H., and Sive, H. (2010). Epithelial relaxation mediated by the myosin phosphatase regulator Mypt1 is required for brain ventricle lumen expansion and hindbrain morphogenesis. *Development* 137, 795-804.
- Häcker, U., and Perrimon, N. (1998). DRhoGEF2 encodes a member of the Dbl family of oncogenes and controls cell shape changes during gastrulation in *Drosophila*. *Genes & Development* 12, 274-284.
- Harris, T.J.C., and Peifer, M. (2004). Adherens junction-dependent and -independent steps in the establishment of epithelial cell polarity in *Drosophila*. *The Journal of Cell Biology* 167, 135-147.
- Harris, T.J.C., and Peifer, M. (2007). aPKC Controls Microtubule Organization to Balance Adherens Junction Symmetry and Planar Polarity during Development. *Developmental Cell* 12, 727-738.
- Herszterg, S., Leibfried, A., Bosveld, F., Martin, C., and Bellaïche, Y. (2013). Interplay between the Dividing Cell and Its Neighbors Regulates Adherens Junction Formation during Cytokinesis in Epithelial Tissue. *Developmental Cell* 24, 256-270.
- Higashi, T., Arnold, T.R., Stephenson, R.E., Dinshaw, K.M., and Miller, A.L. (2016). Maintenance of the Epithelial Barrier and Remodeling of Cell-Cell Junctions during Cytokinesis. *Current Biology* 26, 1829-1842.
- Jaffe, A.B., and Hall, A. (2005). Rho GTPases: Biochemistry and Biology. *Annual Review of Cell and Developmental Biology* 21, 247-269.
- Jha, A., van Zanten, T.S., Philippe, J.-M., Mayor, S., and Lecuit, T. (2018). Quantitative Control of GPCR Organization and Signaling by Endocytosis in Epithelial Morphogenesis. *Current Biology* 28, 1-22.
- Kerridge, S., Munjal, A., Philippe, J.-M., Jha, A., de las Bayonas, A.G., Saurin, A.J., and Lecuit, T. (2016). Modular activation of Rho1 by GPCR signalling imparts polarized myosin II activation during morphogenesis. *Nature Cell Biology*, 1-28.
- Ko, C.S., Tserunyan, V., and Martin, A.C. (2019). Microtubules promote intercellular contractile force transmission during tissue folding. *The Journal of Cell Biology* 218, 2726-2742.
- Kölsch, V., Seher, T.C., Fernandez-Ballester, G.J., Serrano, L., and Leptin, M. (2007). Control of *Drosophila* Gastrulation by Apical Localization of Adherens Junctions and RhoGEF2. *Science* 315, 384-386.
- Kondo, T., and Hayashi, S. (2013). Mitotic cell rounding accelerates epithelial invagination. *Nature* 494, 125-129.
- Kunda, P., Pelling, A.E., Liu, T., and Baum, B. (2008). Moesin Controls Cortical Rigidity, Cell Rounding, and Spindle Morphogenesis during Mitosis. *Current Biology* 18, 91-101.

LeGoff, L., and Lecuit, T. (2015). Mechanical Forces and Growth in Animal Tissues. *Cold Spring Harbor Perspectives in Biology* 8, a019232-019218.

Leptin, M., and Grunewald, B. (1990). Cell shape changes during gastrulation in *Drosophila*. *Development* 110, 73-84.

Li, Y., Naveed, H., Kachalo, S., Xu, L.X., and Liang, J. (2014). Mechanisms of Regulating Tissue Elongation in *Drosophila* Wing: Impact of Oriented Cell Divisions, Oriented Mechanical Forces, and Reduced Cell Size. *PLoS ONE* 9, e86725-86710.

Luxenburg, C., Pasolli, H.A., Williams, S.E., and Fuchs, E. (2011). Developmental roles for Srf, cortical cytoskeleton and cell shape in epidermal spindle orientation. *Nature Cell Biology* 13, 203-314.

Maddox, A.S., and Burridge, K. (2003). RhoA is required for cortical retraction and rigidity during mitotic cell rounding. *The Journal of Cell Biology* 160, 255-265.

Manning, A.J., Peters, K.A., Peifer, M., and Rogers, S.L. (2013). Regulation of Epithelial Morphogenesis by the G Protein–Coupled Receptor Mist and Its Ligand Fog. *Science Signaling* 6, ra98.

Mao, Y., Hoppe, A., Kester, L., Thompson, B.J., Tournier, A.L., and Tapon, N. (2013). Differential proliferation rates generate patterns of mechanical tension that orient tissue growth. *The EMBO Journal* 32, 2790-2803.

Martin, A.C., Gelbart, M., Fernandez-Gonzalez, R., Kaschube, M., and Wieschaus, E.F. (2010). Integration of contractile forces during tissue invagination. *The Journal of Cell Biology* 188, 735-749.

Mason, F.M., Tworoger, M., and Martin, A.C. (2013). Apical domain polarization localizes actin--myosin activity to drive ratchet-like apical constriction. *Nature Publishing Group* 15, 926-936.

Mason, F.M., Xie, S., Vasquez, C.G., Tworoger, M., and Martin, A.C. (2016). RhoA GTPase inhibition organizes contraction during epithelial morphogenesis. *The Journal of Cell Biology* 214, 603-617.

Mata, J., Curado, S., Ephrussi, A., and Rørth, P. (2000). Tribbles Coordinates Mitosis and Morphogenesis in *Drosophila* by Regulating String/CDC25 Proteolysis. *Cell* 101, 511-522.

Matthews, H.K., Delabre, U., Rohn, J.L., Guck, J., Kunda, P., and Baum, B. (2012). Changes in Ect2 Localization Couple Actomyosin-Dependent Cell Shape Changes to Mitotic Progression. *Developmental Cell* 23, 371-383.

Mizuno, T., Amano, M., Kaibuchi, K., and Nishida, Y. (1999). Identification and characterization of *Drosophila* homolog of Rho-kinase. *Gene* 238, 437-444.

Perez-Mockus, G., Mazouni, K., Roca, V., Corradi, G., Conte, V., and Schweisguth, F. (2017). Spatial regulation of contractility by Neuralized and Bearded during furrow invagination in *Drosophila*. *Nature Communications* 8, 1-15.

Prokopenko, S.N., Brumby, A., OKeefe, L., Prior, L., He, Y., Saint, R., and Bellen, H.J. (1999). A putative exchange factor for Rho1 GTPase is required for initiation of cytokinesis in *Drosophila*. *Genes & Development* 13, 2301-2314.

Ramanathan, S.P., Helenius, J., Stewart, M.P., Cattin, C.J., Hyman, A.A., and Muller, D.J. (2015). Cdk1-dependent mitotic enrichment of cortical myosin II promotes cell rounding against confinement. *Nature Cell Biology* 17, 148-159.

Reinsch, S., and Karsenti, E. (1994). Orientation of spindle axis and distribution of plasma membrane proteins during cell division in polarized MDCKII cells. *The Journal of Cell Biology* 126, 1509-1526.

Rogers, S.L., Wiedemann, U., Häcker, U., Turck, C., and Vale, R.D. (2004). *Drosophila* RhoGEF2 Associates with Microtubule Plus Ends in an EB1-Dependent Manner. *Current Biology* 14, 1827-1833.

Rosa, A., Vlassaks, E., Pichaud, F., and Baum, B. (2015). Ect2/Pbl Acts via Rho and Polarity Proteins to Direct the Assembly of an Isotropic Actomyosin Cortex upon Mitotic Entry. *Developmental Cell* 32, 604-616.

Royou, A., Sullivan, W., and Karess, R. (2002). Cortical recruitment of nonmuscle myosin II in early syncytial *Drosophila* embryos: its role in nuclear axial expansion and its regulation by Cdc2 activity. *The Journal of Cell Biology* 158, 127-137.

Russell, P., and Nurse, P. (1986). *cdc25+* Functions as an Inducer in the Mitotic Control of Fission Yeast. *Cell* 45, 145-153.

Sawyer, J.M., Harrell, J.R., Shemer, G., Sullivan-Brown, J., Roh-Johnson, M., and Goldstein, B. (2010). Apical constriction: A cell shape change that can drive morphogenesis. *Developmental Biology* 341, 5-19.

Seher, T.C., and Leptin, M. (2000). Tribbles, a cell-cycle brake that coordinates proliferation and morphogenesis during *Drosophila* gastrulation. *Current Biology* 10, 623-629.

Sorce, B., Escobedo, C., Toyoda, Y., Stewart, M.P., Cattin, C.J., Newton, R., Banerjee, I., Stettler, A., Roska, B., Eaton, S., *et al.* (2015). Mitotic cells contract actomyosin cortex and generate pressure to round against or escape epithelial confinement. *Nature Communications* 6, 1-12.

Stewart, M.P., Helenius, J., Toyoda, Y., Ramanathan, S.P., Muller, D.J., and Hyman, A.A. (2010). Hydrostatic pressure and the actomyosin cortex drive mitotic cell rounding. *Nature* 469, 226-230.

Su, K.-C., Takaki, T., and Petronczki, M. (2011). Targeting of the RhoGEF Ect2 to the Equatorial Membrane Controls Cleavage Furrow Formation during Cytokinesis. *Developmental Cell* 21, 1104-1115.

Suarez, C., and Kovar, D.R. (2016). Internetwork competition for monomers governs actin cytoskeleton organization. *Nature Publishing Group* 17, 1-12.

Sui, L., Alt, S., Weigert, M., Dye, N., Eaton, S., Jug, F., Myers, E.W., Julicher, F., Salbreux, G., and Dahmann, C. (2018). Differential lateral and basal tension drive folding of *Drosophila* wing discs through two distinct mechanisms. *Nature Communications* 9, 1-13.

Sweeton, D., Parks, S., Costa, M., and Wieschaus, E.F. (1991). Gastrulation in *Drosophila*: the formation of the ventral furrow and posterior midgut invaginations. *Development* 112, 775-789.

West, J.J., Zulueta-Coarasa, T., Maier, J.A., Lee, D.M., Bruce, A.E.E., Fernandez-Gonzalez, R., and Harris, T.J.C. (2017). An Actomyosin-Arf-GEF Negative Feedback Loop for Tissue Elongation under Stress. *Current Biology* 27, 1-24.

Yevick, H.G., Miller, P.W., Dunkel, J., and Martin, A.C. (2019). Structural Redundancy in Supracellular Actomyosin Networks Enables Robust Tissue Folding. *Developmental Cell* 50, 586-598.

Yoshizaki, H., Ohba, Y., Kurokawa, K., Itoh, R.E., Nakamura, T., Mochizuki, N., Nagashima, K., and Matsuda, M. (2003). Activity of Rho-family GTPases during cell division as visualized with FRET-based probes. *The Journal of Cell Biology* 162, 223-232.

Young, P.E., Pesacreta, T.C., and Kiehart, D.P. (1991). Dynamic changes in the distribution of cytoplasmic myosin during *Drosophila* embryogenesis. *Development* 111, 1-14.

Yüce, Ö., Piekny, A., and Glotzer, M. (2005). An ECT2-centralspindlin complex regulates the localization and function of RhoA. *The Journal of Cell Biology* 170, 571-582.

**Table S1**

| <b>Stock</b> | <b>Genotype</b>                                       | <b>Source</b>                       |
|--------------|-------------------------------------------------------|-------------------------------------|
| 1            | w; P{w+ Ubi-H2A::GFP}3                                | Bloomington Drosophila Stock Center |
| 2            | w; gap43::mCherry-7/TM3                               | Bardet et al., 2013                 |
| 3            | y, w; P{w+ sqh::GFP}42; Df(3L)ri-79c/TM3, Sb[1]       | This study                          |
| 4            | y, w; P{w+ sqh::GFP}42; P{EP}trblEP3519/TM3, Sb[1]    | This study                          |
| 5            | UAS-fog gA/TM3, Sb, Ser                               | Dawes-Hoang et al., 2005            |
| 6            | w; mat67, Sqh::GFP; mat15, Gap43::mCherry/TM3, Sb[1]  | Vasquez et al., 2014                |
| 7            | y, w; mat67, Sqh::mCherry; mat15, E-cadherin::GFP     | Mason et al., 2016                  |
| 8            | arm043A01, FRT101/FM7; sqh::GFP                       | Martin et al., 2010                 |
| 9            | ovoD1, FRT101; hsFLP                                  | Martin et al., 2010                 |
| 10           | y, w; sqh>rok(K116A)::GFP; Df(3L)ri-79c/TM3, Sb[1]    | This study                          |
| 11           | y, w; sqh>rok(K116A)::GFP; P{EP}trblEP3519/TM3, Sb[1] | This study                          |
| 12           | w; P{UAS-stg}/CyO                                     | Bloomington Drosophila Stock Center |
| 13           | w; mat67, UAS-BazGFP[r1]/CyO                          | Eric Wieschaus (Wang et al., 2012)  |

| <b>Figure</b>        | <b>Stocks used (Female x Male)</b> |
|----------------------|------------------------------------|
| 1                    | 1 x 2                              |
| 2A-B                 | 3 x 4                              |
| 2D-F;<br>4C;<br>5A-C | 5 x 6                              |
| 2A-B                 | 2 Sibling Cross                    |
| 3A-C                 | 8 x 9                              |
| 3D-E                 | 13 Sibling Cross                   |
| 4                    | 10 x 11                            |
| 5C-E                 | 5 x 7                              |
| S1                   | 12 x 6                             |
| S2                   | 5 x 7                              |

# Figure legends

**Figure 1. Premature mitotic entry in *trbl* mutant embryos reverses apical constrictions.** (A-A') During wild-type ventral furrow (VF) formation, cells apically constrict. (A) Images are maximum intensity projections from a live embryo expressing H2A::GFP and Gap43::mCherry. (A') Representative cells were segmented and their apical cell areas were tracked over time. The average trace of 12 cells with standard deviation is shown on the right. (B-B') In *trbl* RNAi embryos, mesoderm cells prematurely divide and increase apical area. (B) Images are maximum intensity projections from a live embryo expressing H2A::GFP and Gap43::mCherry injected with *trbl* dsRNA. (B') Representative cells were segmented and their apical cell areas were tracked over time. The average trace of 12 cells with standard deviation is shown on the right. (C) Individual cells in *trbl* embryos can initiate constriction and reverse their constricted shape upon mitotic entry. Images are maximum intensity projections from a live embryo expressing H2A::GFP and Gap43::mCherry injected with *trbl* dsRNA. An outline of a cell marked by the asterisk in the images is shown on the right. (D) Cartoon diagram depicting isotropic and anisotropic constrictions. Cell apex anisotropy is calculated as the cell length along the anteroposterior axis (AP, x) over the dorsoventral axis (DV, y). (E) Dividing cells in *trbl* RNAi embryos become more isotropic. Quantification of cell apex anisotropy over time in control and *trbl* RNAi embryos (after apical constriction has initiated). Scale bars, 20  $\mu$ m (A and B), 10  $\mu$ m (C).

**Figure 2. Apical myosin activation is disrupted upon mitotic entry.** (A) Apical myosin is disrupted in cells that prematurely divide in *trbl* embryos. Images are maximum intensity projections from a live trans-heterozygous embryo (Df/EP3519) expressing Myo::GFP (Sqh::GFP). Control embryos are heterozygotes with a wild-type copy of *trbl*. (B) Montage of a Df/EP3519 embryo expressing Myo::GFP, which shows apical myosin dissipate as cell rounds. (C) Cartoon diagram showing mitotic domains (MD) 1,3, and 5 (blue, red, and orange, respectively). (D) Apical myosin is lost in mitotic domain cells in the ectoderm. Images are maximum intensity projections from a live embryo with ectopic *fog* in the ectoderm expressing Myo::GFP and Gap43::mCherry. (E) Montage of *fog*-overexpressing embryo with Myo::GFP and Gap43::mCherry. Apical myosin reaccumulates in both daughter cells after mitosis completes. Midbody is marked by the yellow arrowhead. (F) Quantification of mean cell area (blue) and myosin intensity (orange) with standard deviations for a representative *fog*-overexpressing embryo (n = 10 cells). Scale bars, 15  $\mu$ m (A and D), 10  $\mu$ m (E), 5  $\mu$ m (B).

**Figure 3. Apical contractility loss is not due to disrupted adhesion or apical-basal polarity.** (A) In *arm* mutants, cells become mechanically uncoupled and the supracellular myosin meshwork fragmented. Images are maximum intensity projections from control (wild-type) and maternal and zygotic *arm* mutants expressing Myo::GFP. Cross-section views are to the right of each *en face* view. (B) Apical contractility is sustained in cells with rounded morphology in *arm* mutants. Image is a maximum intensity projection from a live maternal and zygotic *arm* mutant expressing Myo::GFP. (C) Apical myosin is lost during mitosis of the rounded, *arm* mutant cells. Images are maximum intensity projections from a maternal and zygotic *arm* mutant expressing

Myo::GFP (zoom from red box in B)). Cytokinetic furrows are highlighted by yellow arrowheads. (D) Baz polarity is unaffected during mitosis. Images are apical (top) and basal (~8  $\mu\text{m}$  below apical slice; bottom) *en face* views of *fog* overexpressing embryos with GFP-tagged Baz. Cross-section views of mitotic cells are shown in (E). Mitotic cells are marked with white asterisks. (F) Baz is apically polarized in both mitotic and non-mitotic cells. Quantification of the ratio of maximum pixel intensity values of Baz::GFP in the apical to basolateral domain ( $n = 30$  cells each; unpaired  $t$  test). Bottom and top edges of the boxplot are 25<sup>th</sup> and 75<sup>th</sup> percentiles, with median marked by the colored line. Whiskers extend to the most extreme data points. Scale bars, 15  $\mu\text{m}$  (A, B, and D), 10  $\mu\text{m}$  (C), 5  $\mu\text{m}$  (E)

**Figure 4. Different Rho GEFs exhibit distinct localization changes upon mitotic entry.** (A) Medioapical ROCK localization is not sustained in *trbl* mutants. Images are maximum intensity projections from embryos that are either trans-heterozygous for the deficiency and P-element insertion (mutant) or not trans-heterozygous (control). Embryos are also expressing kinase dead rok(K116A)::GFP. (B) Apical ROCK foci disappear during mitosis. Montage from the *trbl* mutant embryo shown in (A). The cytokinetic ring is highlighted by the yellow arrowheads. (C) RhoGEF2 localization is less cortical and more cytoplasmic in mitotic cells. Images are single sub-apical slices of a fixed representative *fog* overexpressing embryo immunostained against GFP-tagged RhoGEF2 and phalloidin to visualize F-actin. Asterisks mark mitotic cells in the cross-section images (bottom) with cytoplasmic enrichment of RhoGEF2 highlighted by yellow arrowheads. (D) Pebble/Ect2 localizes to the cortex after mitotic entry. Images are maximum intensity projections from a live embryo expressing Pbl::GFP under a myosin promoter. One mitotic cell and its daughter cells are marked by the asterisks. The site of cytokinetic furrow formation is marked by yellow arrowheads. Scale bars, 15  $\mu\text{m}$  (A), 10  $\mu\text{m}$  (B - D).

**Figure 5. Ectopic furrows form between mitotic domains in embryos with ectopic *fog* expression.** (A) Non-mitotic, contractile cells between mitotic domains invaginate during gastrulation. Images are maximum intensity projections from a live *fog* overexpressing embryo expressing Myo::GFP and Gap43::mCherry. The ectopic furrow is shown by a white dashed line. The invagination posterior to mitotic domain (MD) 5 is the cephalic furrow (CF). (B) Cross-section views of local tissue invaginations from the embryo in (A). Images from control embryo not ectopically expressing *fog* are in Figure S2. (C) Quantification of apical cell area and cell anisotropies in non-mitotic (orange in cartoon) and mitotic (blue in cartoon) cells. Across 6 representative *fog* overexpressing embryos, 26 furrow cells and 33 mitotic domain cells were analyzed. Across 5 representative control embryos (Rhodopsin 3 shRNA line), 133 non-mitotic cells and 66 mitotic domain cells were analyzed (\*\*\*,  $P < .0001$ ; \*\*,  $P < .01$ , unpaired  $t$  test). For change in cell area, significance from 0 was determined with a one sample  $t$  test. Bottom and top edges of the boxplot are 25<sup>th</sup> and 75<sup>th</sup> percentiles, with median marked by the colored line. Whiskers extend to the most extreme data points. (D) Quantification of apical cell area in a representative *fog* overexpressing embryo. Individual cell traces as well as averages with standard deviation are shown for mitotic domain cells (blue;  $n = 6$  cells) and non-mitotic domain cells (brown;  $n = 28$  cells). The initiation of mitotic

rounding is marked by the purple arrow. (E) Mitotic cells become stretched towards the ectopic furrow (dashed line). Images are maximum intensity projections of *fog* overexpressing embryos expressing E-cadherin::GFP. The same cell is highlighted by the yellow asterisk. The axis of stretch is indicated by the double-sided arrow. The body axes of the embryo (AP, orange; DV, purple) are shown on the bottom set of images. - Scale bars, 15  $\mu$ m.

**Figure 6. Different patterns of mitotic entry result in distinct morphogenetic outcomes.** Cartoon diagrams of a model contractile epithelium with different spatial patterns of mitotic entry. Apically constricting cells (yellow) that enter mitosis (blue) lose medioapical myosin and reverse their constricted cell shape (box). In the *trbl* mutant (top), all the cells in the contractile tissue enter mitosis, which disrupts tissue folding. Mitotic cells in the mesoderm expand isotropically (magenta arrows). In contrast, when mitotic cells are interspersed by non-mitotic cells that sustain apical contractility, such as in the dorsal head of embryos with ectopic *fog* expression (bottom), mitotic cells that lose medioapical myosin expand anisotropically as they are pulled towards constricting cells (brown arrows).

**Video 1. *Trbl* RNAi causes premature cell divisions in the mesoderm.** Embryos expressing Histone::GFP (H2A; green) and Gap43::mCH (magenta) injected with buffer (top) or dsRNA (bottom). Images were acquired every 15 seconds (top) or 22 seconds (bottom) and videos are displayed at 15 frames per second. Bars, 20  $\mu$ m.

**Video 2. Apical myosin is lost in dividing cells of *trbl* mutants.** Trans-heterozygous embryo (Df/EP3519), which displays the *trbl* phenotype, expressing Myo::GFP. Images were acquired every 6 seconds and video is displayed at 20 frames per second. Bars, 20  $\mu$ m.

**Video 3. Ectopic expression of *fog* in the ectoderm.** Embryos with ectopic *fog* overexpression expressing Myo::GFP (green) and Gap43::mCH (magenta). Medioapical myosin is lost in mitotic cells and ectopic furrows form between mitotic domains. Images were acquired every 17 seconds and video is displayed at 15 frames per second. Bars, 20  $\mu$ m.

## Supplementary Information

### Supplementary Figures

**Figure S1. Overexpressing *string* (CDC25) results in the completion of cycle 14 divisions before ventral furrow formation.** Images are maximum intensity projections of a live *string* overexpressing embryo with Myo::GFP and Gap43::mCherry. A cytokinetic furrow from a premature division in the mesoderm is highlighted by a yellow arrowhead. Scale bars, 15  $\mu$ m.

**Figure S2. Furrows do not normally form between mitotic domains in the dorsal head.** Images are maximum intensity projections from a live control embryo (Rhodopsin 3 shRNA line) expressing Myo::CH and E-cadherin::GFP. Scale bars, 15  $\mu$ m.

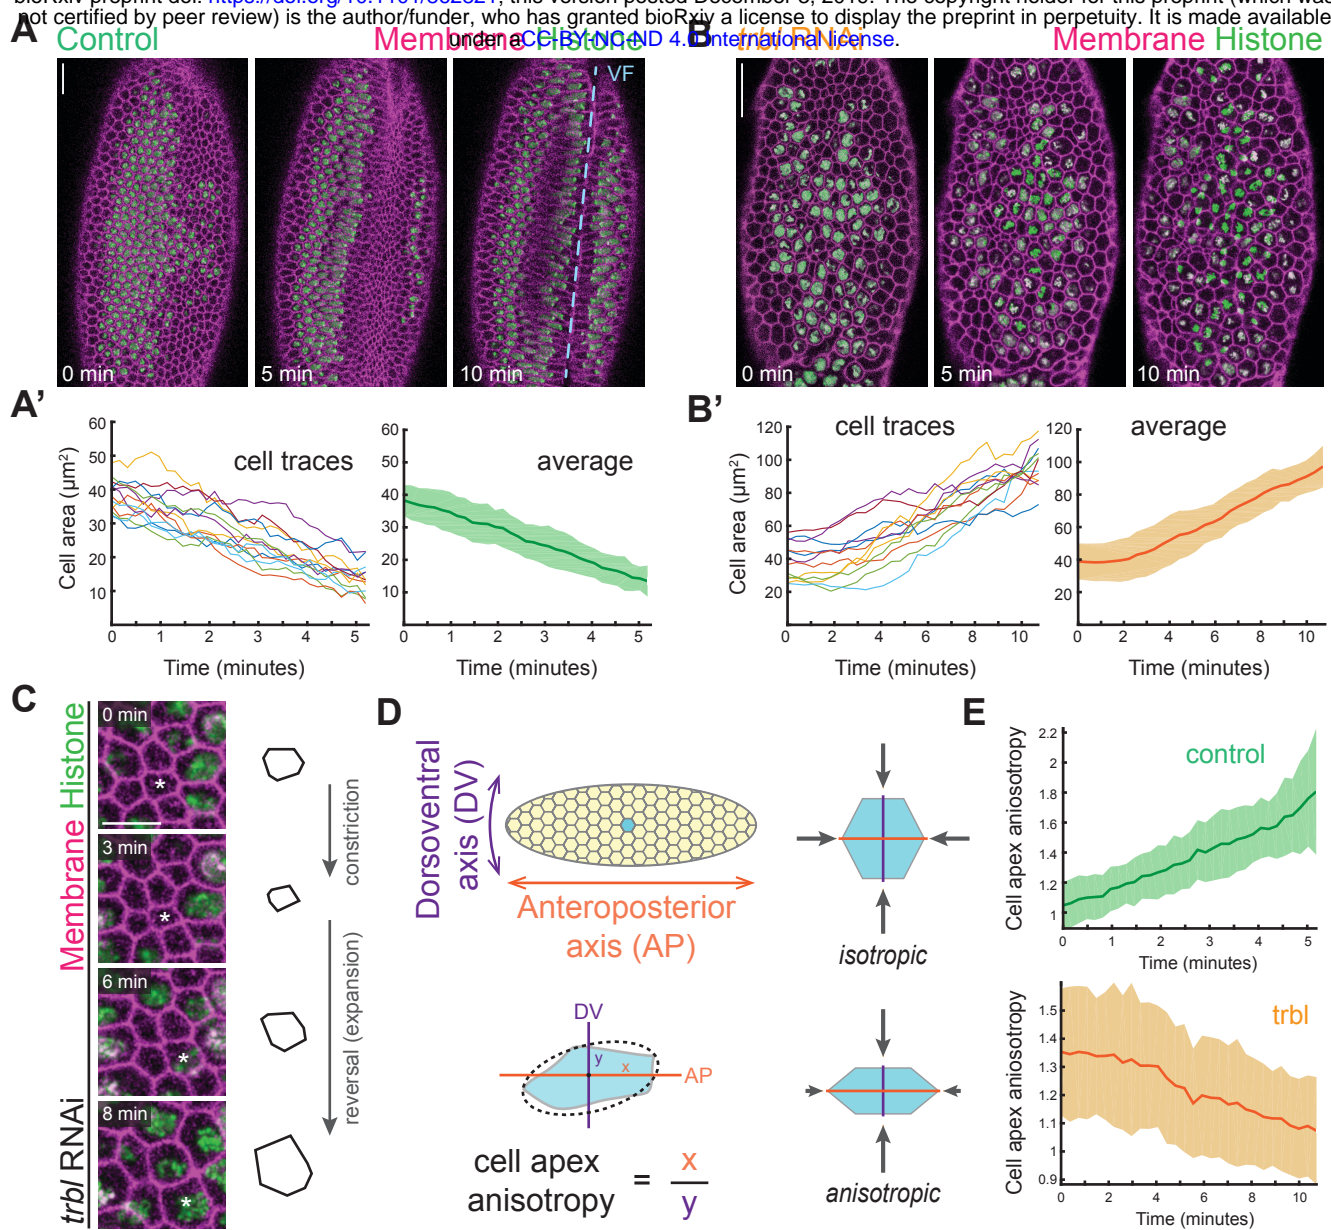

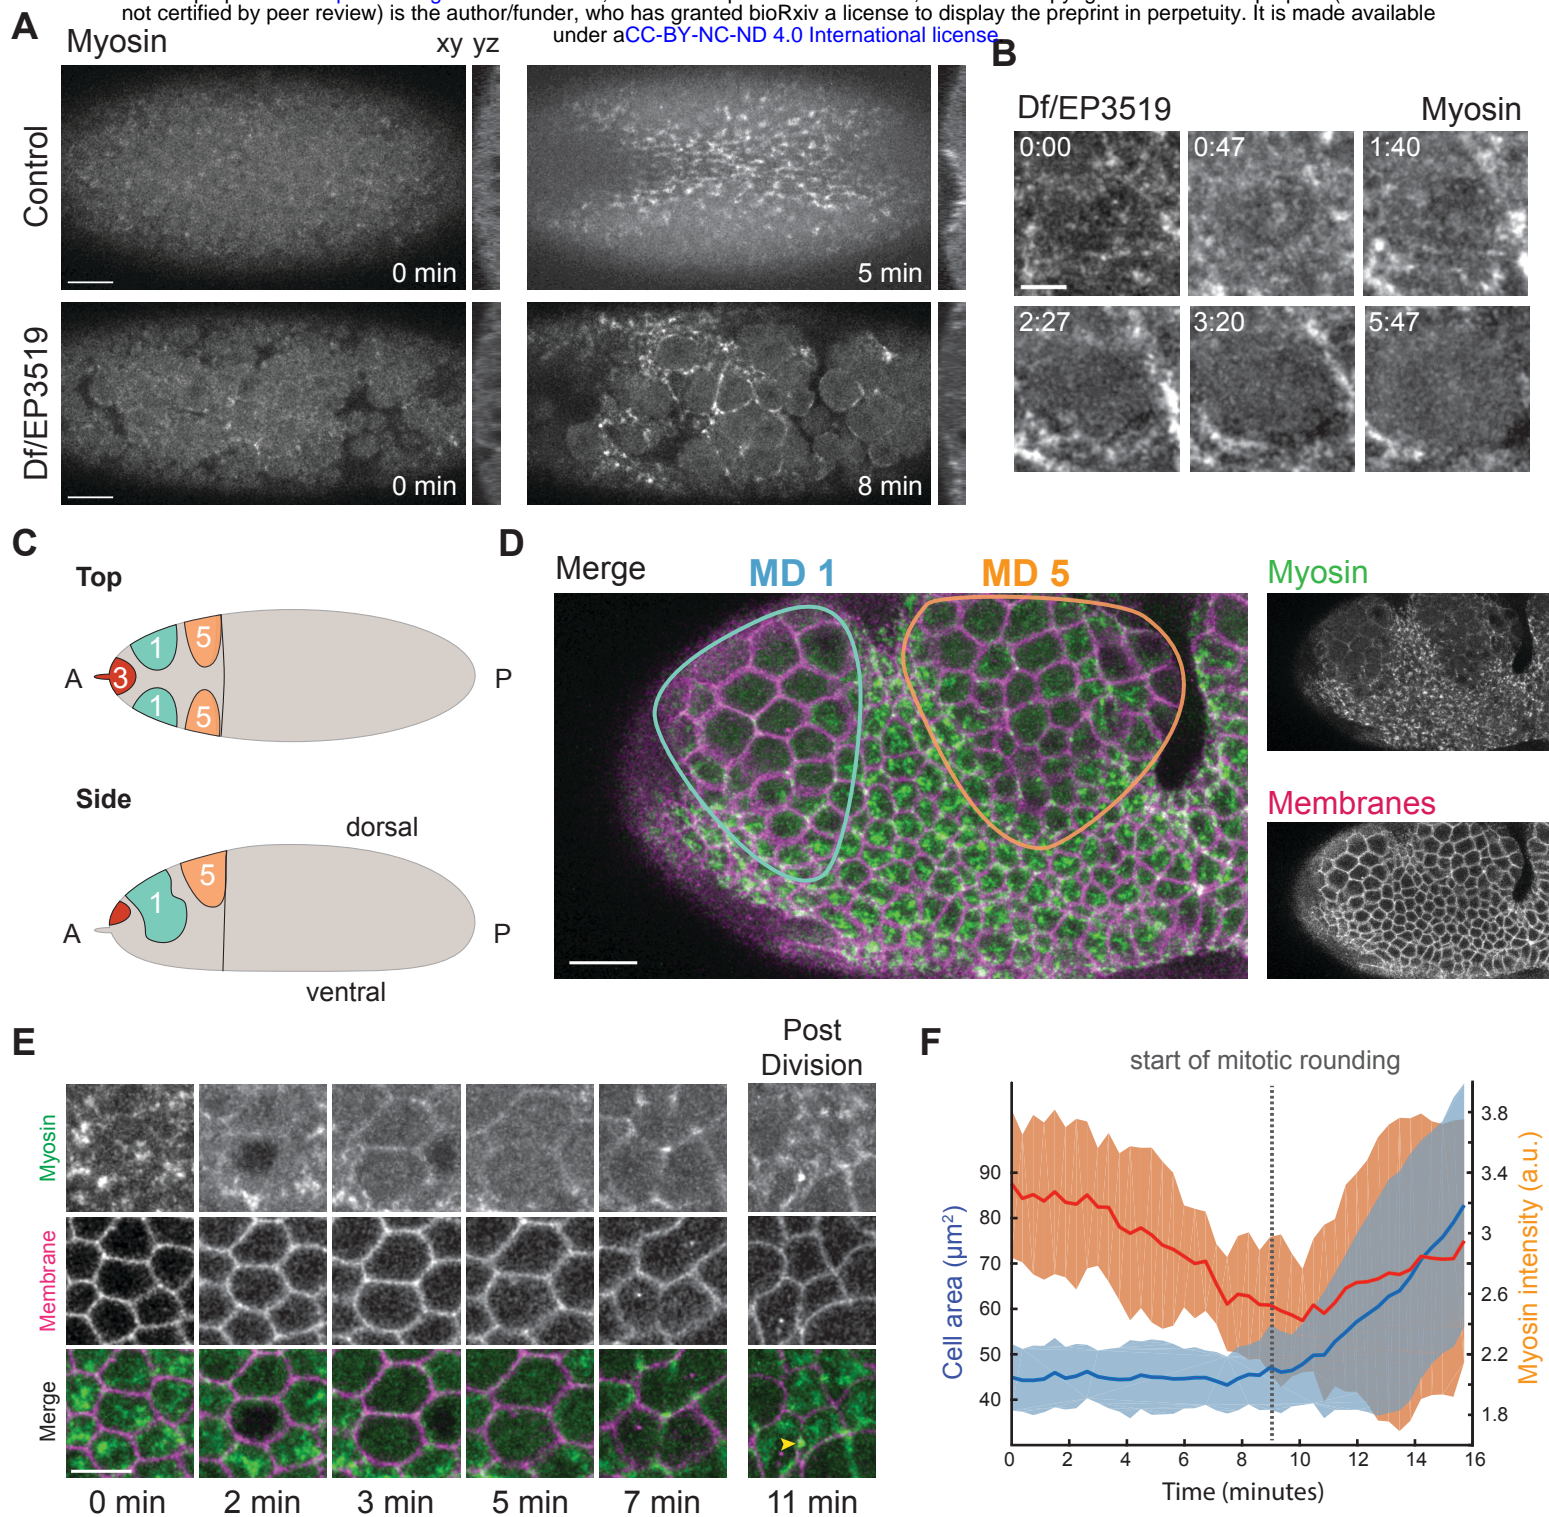

**A**

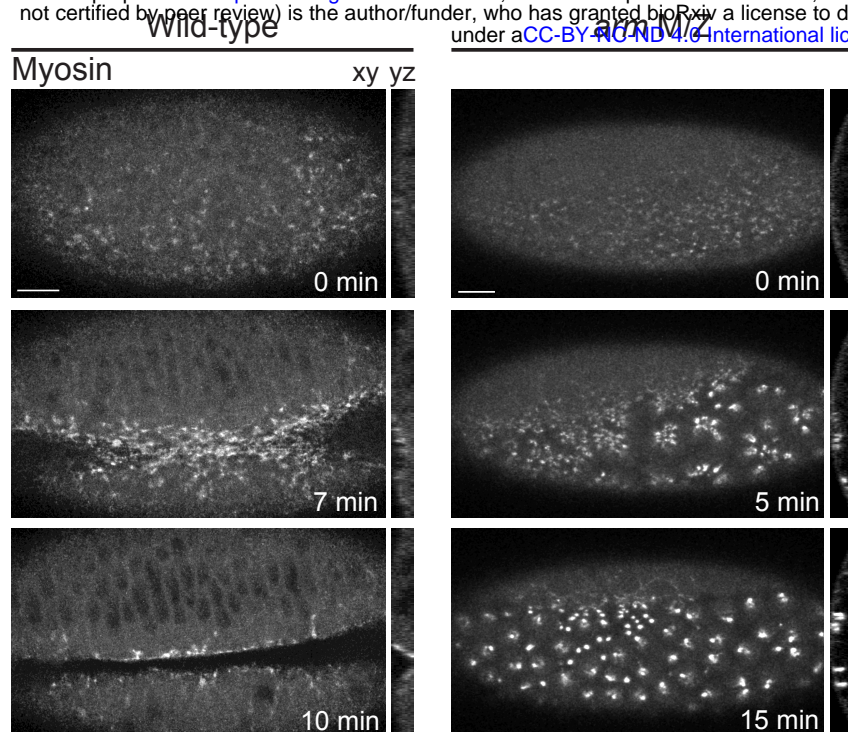

**B**

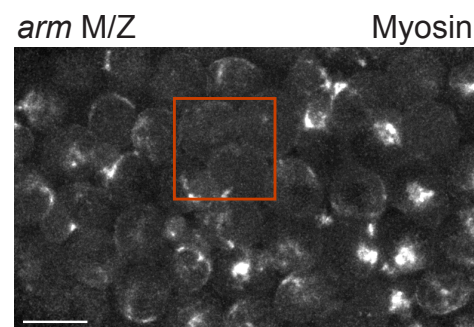

**C**

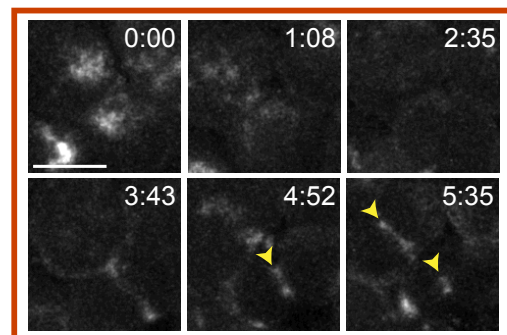

**D**

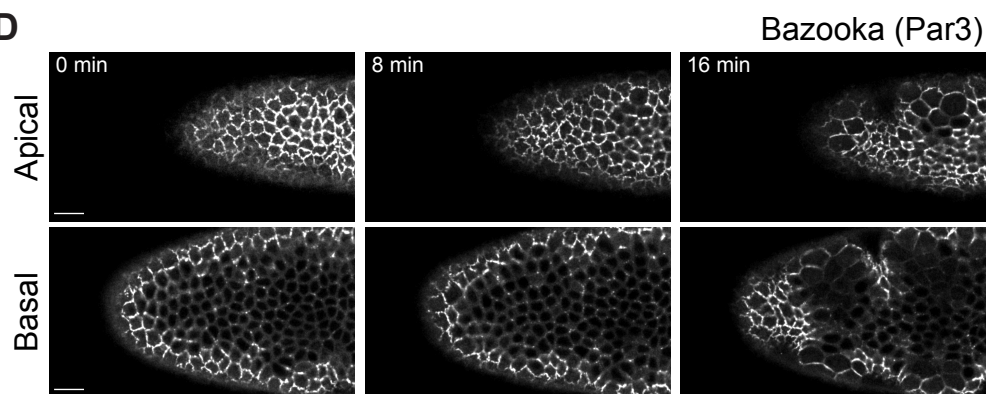

**E**

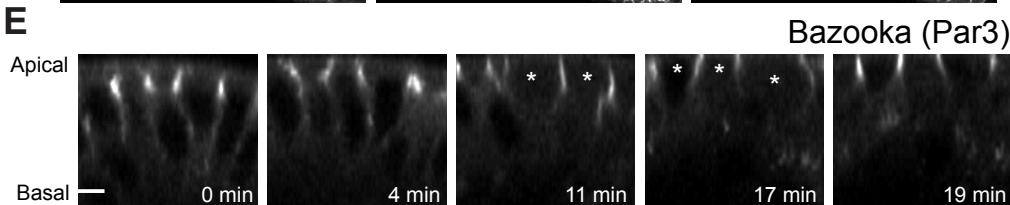

**F**

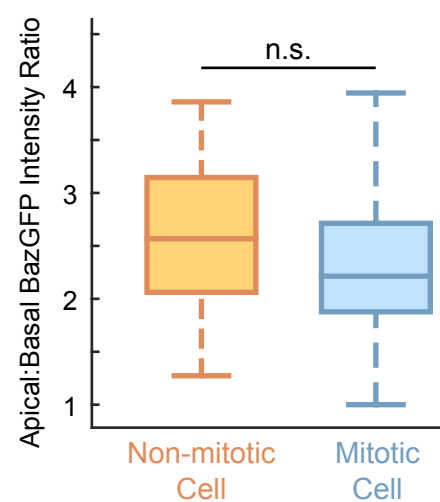

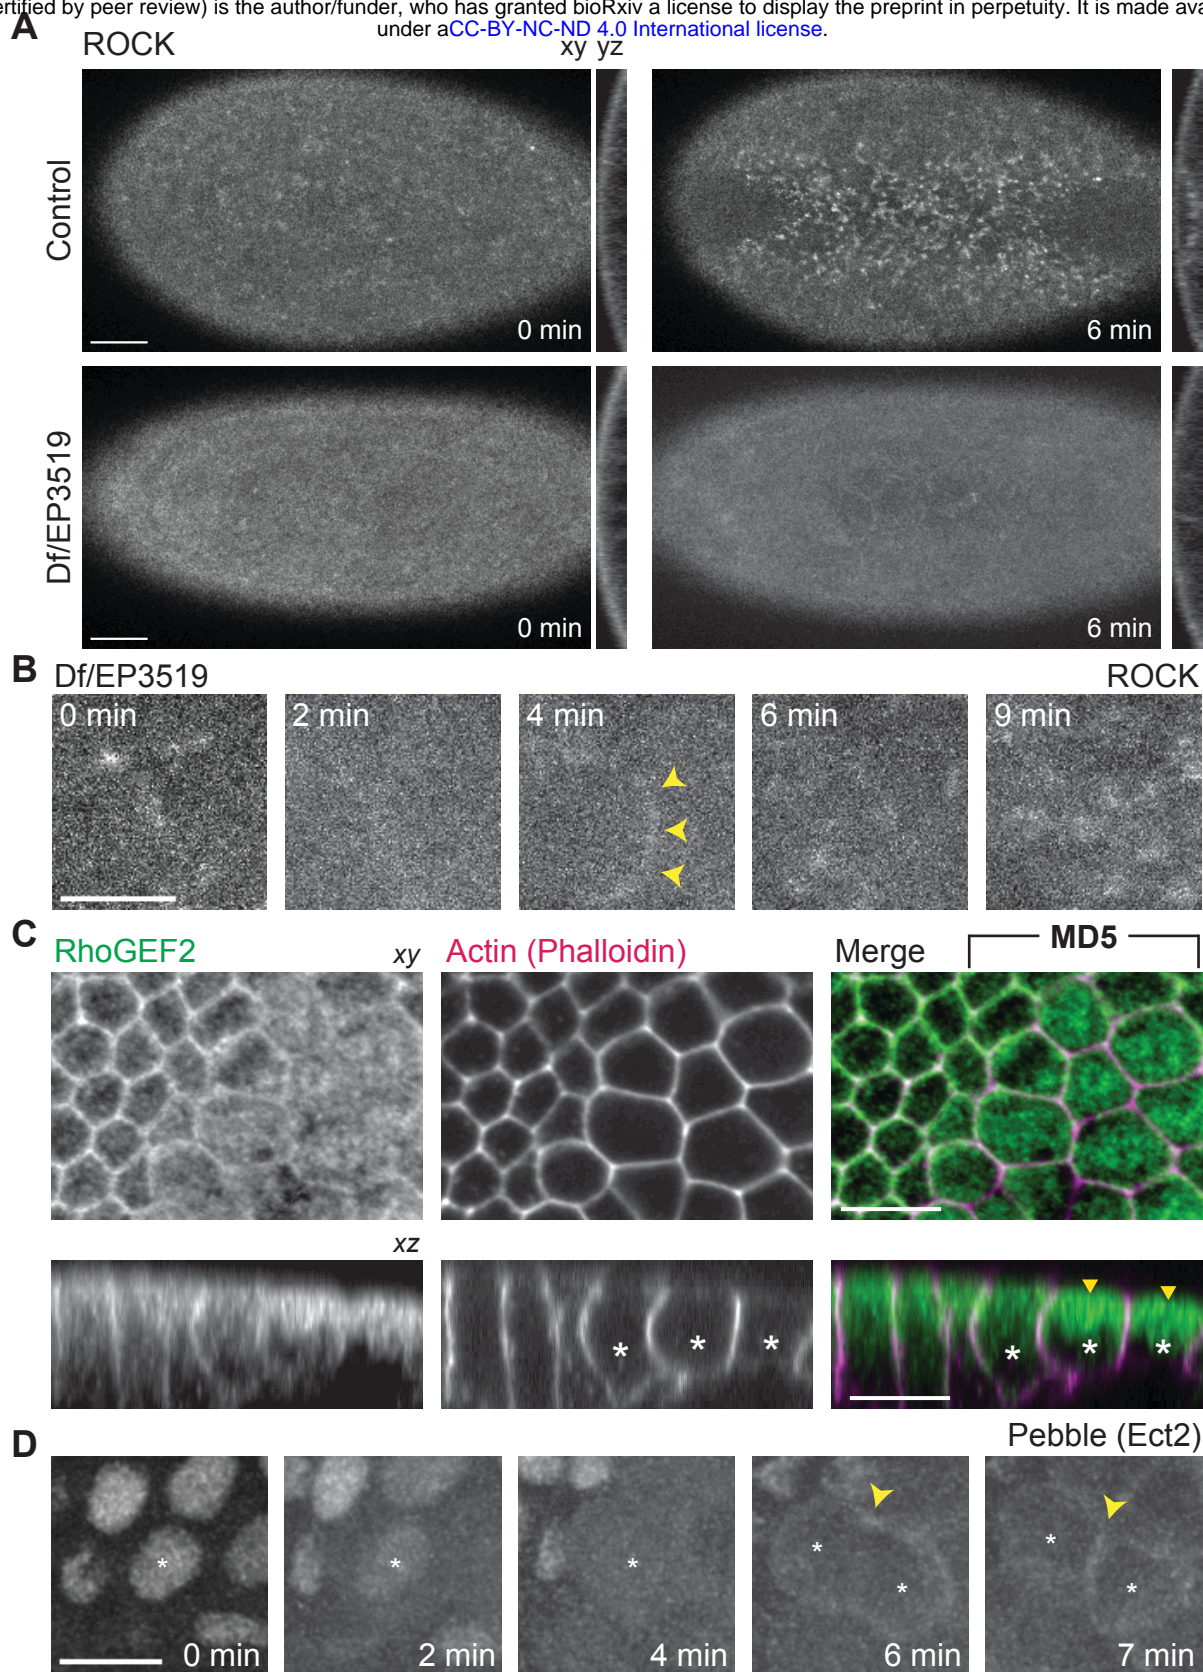

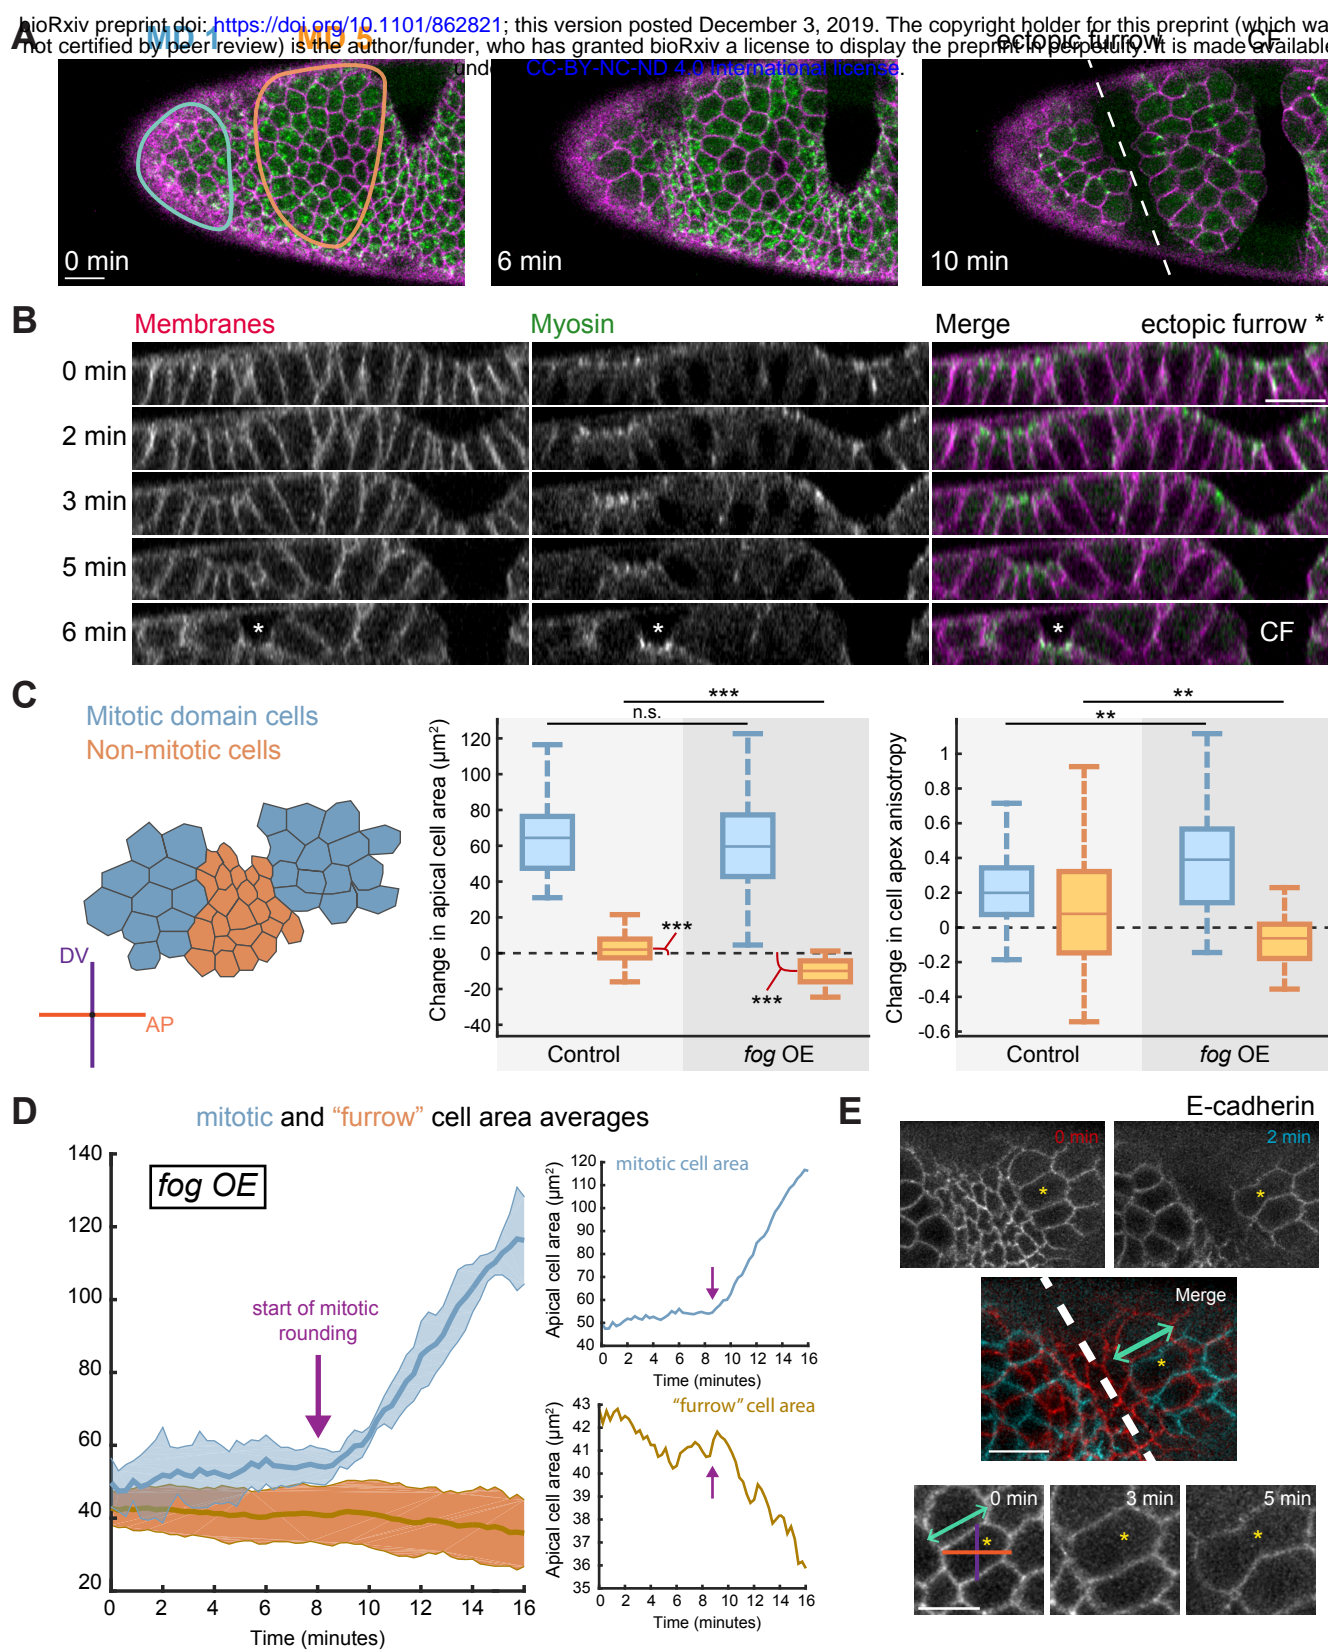

# Loss of apical constriction across the tissue prevents mesoderm invagination

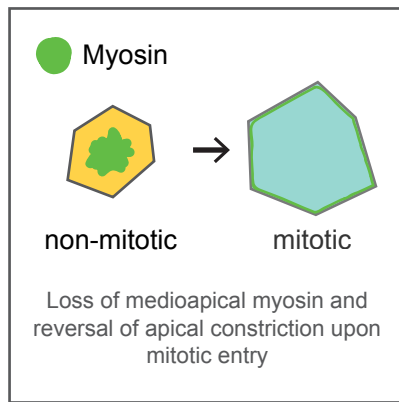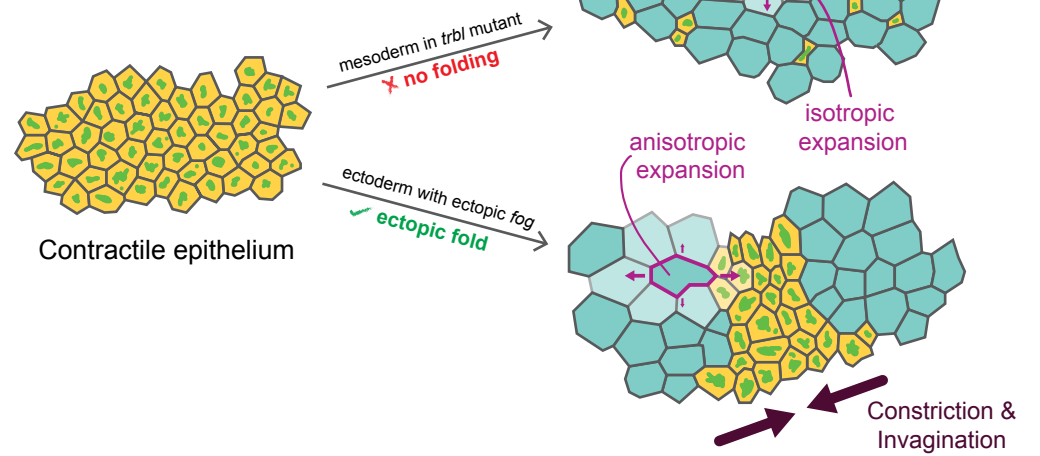

Loss of apical constriction in mitotic domain cells allows non-mitotic cells to constrict

string overexpression

Myosin

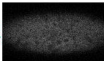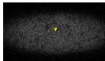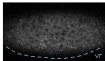

Membranes

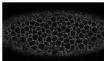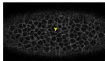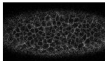

Merge

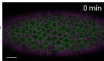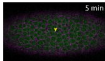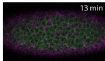

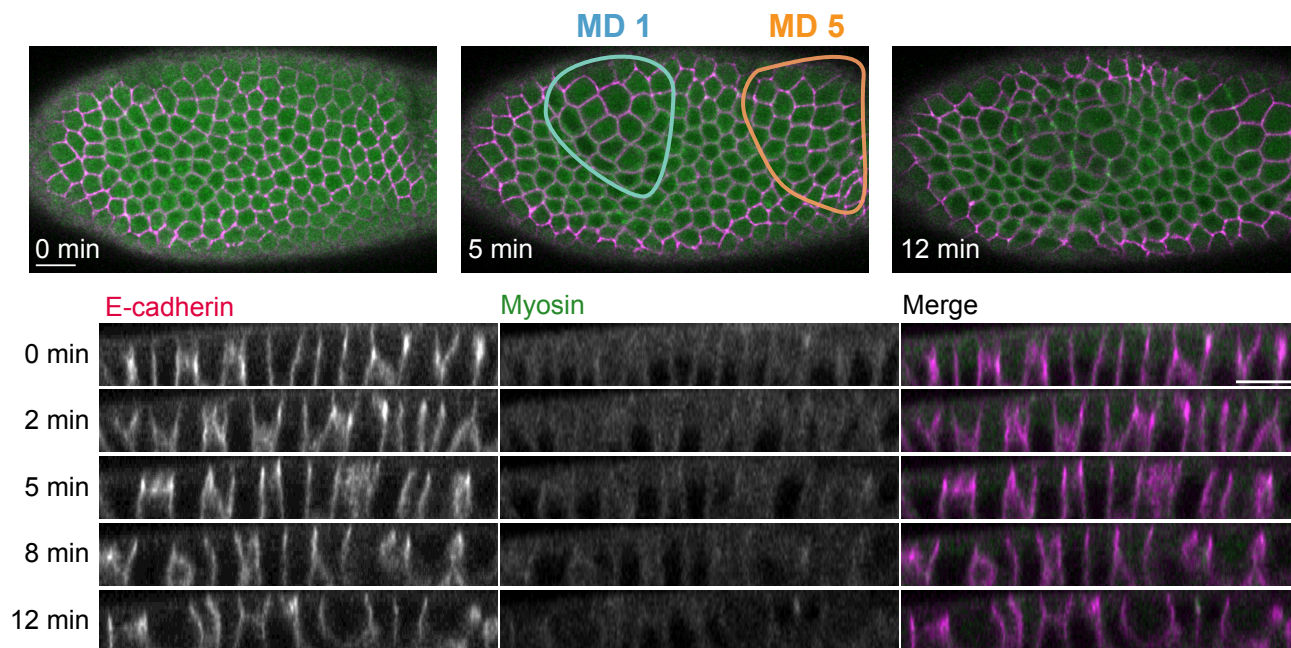

Source: http://biorxiv.org/content/10.1101/862821v1.full.pdf
